# Supplementary material for: Exploring Echinops polyceras Boiss. from Jordan: Essential Oil Composition, COX, Protein Denaturation Inhibitory Power and Antimicrobial Activity of the Alcoholic Extract
Source: MDPI journal article supplement (doi:10.3390/molecules28104238), 2023-05-22
Supplement: s1 [file s1]

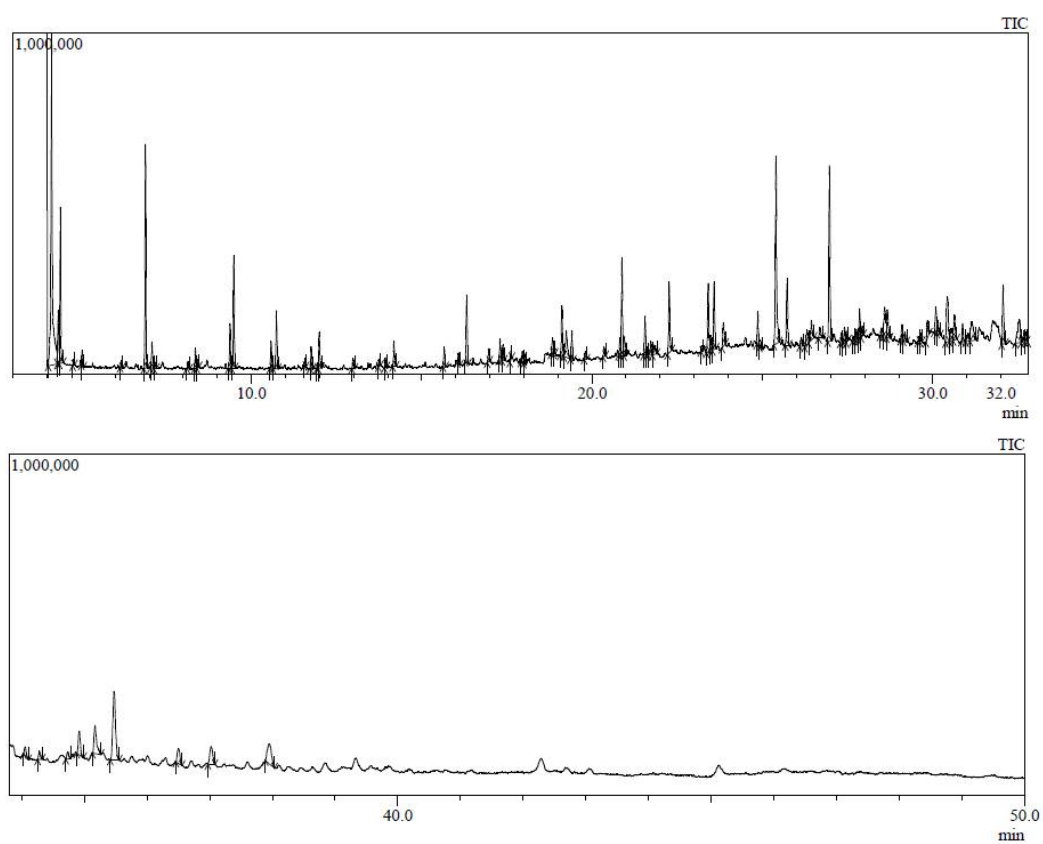

Figure S1: GC-MS analysis of essential oil during pre-flowering stage of *Echinops polyceras* Boiss. Inflorescence

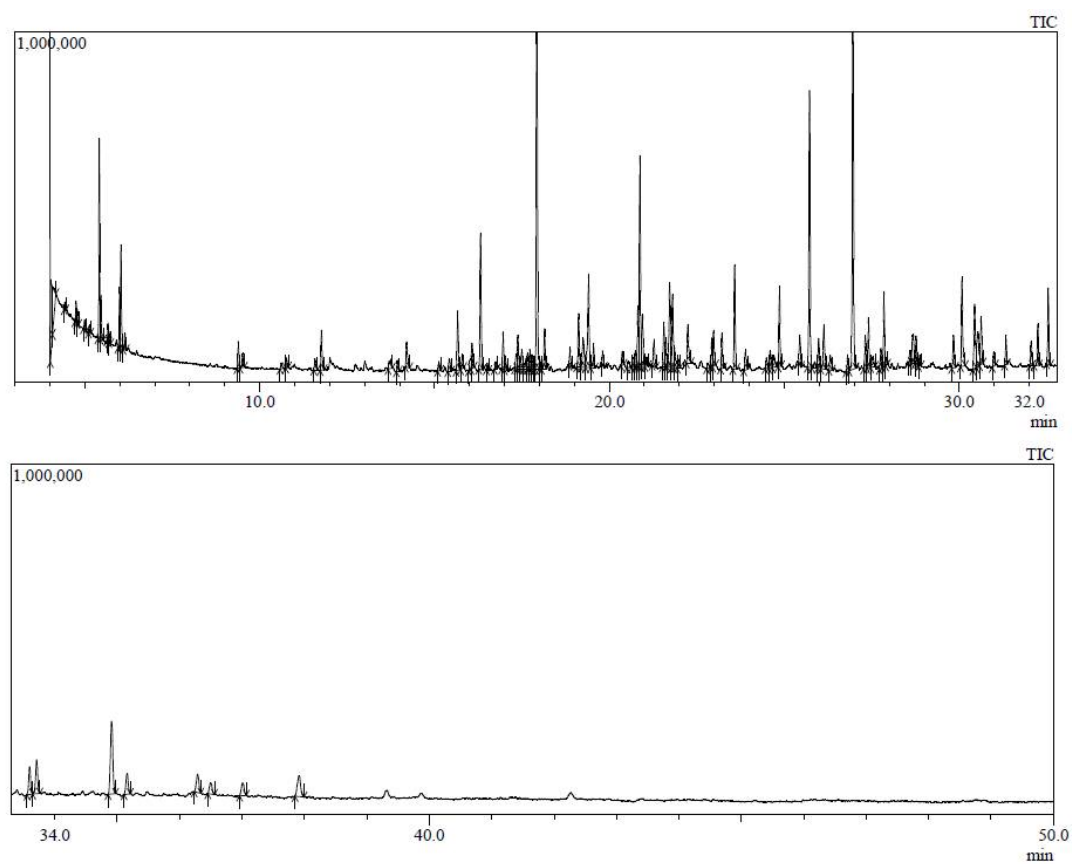

Figure S2: GC-MS analysis of essential oil during full-flowering stage of *Echinops polyceras* Boiss. Inflorescence

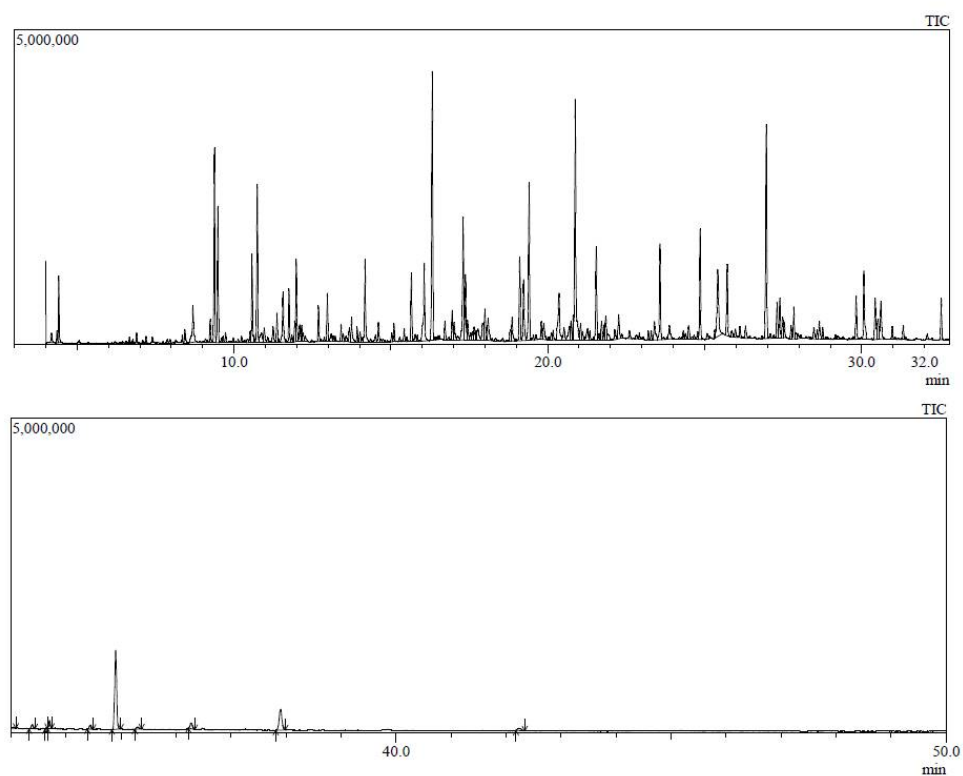

Figure S3: GC-MS analysis of essential oil during post-flowering stage of *Echinops polyceras* Boiss. inflorescence
